# Supplementary material
Source: PubMed Central journal article supplement (PMC1569194)
Supplement: pnas_0603456103_4.pdf [file pnas_0603456103_4.pdf]

**Table 2. Microarray analysis of RovA regulon in *Y. pestis***

| Identification       | ORF description                      | Array           | qRT-PCR                     |
|----------------------|--------------------------------------|-----------------|-----------------------------|
|                      |                                      | fold<br>change* | fold<br>change <sup>†</sup> |
| Down-regulated loci  |                                      |                 |                             |
| YPO0027              | Conserved hypothetical protein       | -2.6            |                             |
| YPO0102              | Putative exported protein            | -4.1            |                             |
| YPO0289              | Putative ATP/GTP-binding protein     | -2.8            |                             |
| YPO0291              | Conserved hypothetical protein       | -3.3            |                             |
| YPO0292              | Conserved hypothetical protein       | -3.4            |                             |
| YPO0499 <sup>‡</sup> | Hypothetical protein                 | -4.6            | -4.4                        |
| YPO0500 <sup>‡</sup> | Conserved hypothetical protein       | -5.1            |                             |
| YPO0501 <sup>‡</sup> | Conserved hypothetical protein       | -5.8            |                             |
| YPO0502 <sup>‡</sup> | Conserved hypothetical protein       | -3.7            |                             |
| YPO0503 <sup>‡</sup> | Conserved hypothetical protein       | -5.9            |                             |
| YPO0504 <sup>‡</sup> | Conserved hypothetical protein       | -5.0            | -5.1                        |
| YPO0505 <sup>‡</sup> | Conserved hypothetical protein       | -4.8            |                             |
| YPO0506 <sup>‡</sup> | <i>clpB/htpM</i> putative Clp ATPase | -5.5            | -3.1                        |
| YPO0507 <sup>‡</sup> | Conserved hypothetical protein       | -5.4            | -4.2                        |
| YPO0508 <sup>‡</sup> | Hypothetical protein                 | -5.6            |                             |
| YPO0509 <sup>‡</sup> | Hypothetical protein                 | -2.6            |                             |
| YPO0510 <sup>‡</sup> | Hypothetical protein                 | -4.6            | -5.3                        |
| YPO0511 <sup>‡</sup> | Hypothetical protein                 | -5.3            |                             |

|                       |                                                          |       |       |
|-----------------------|----------------------------------------------------------|-------|-------|
| YPO0511a <sup>‡</sup> | Hypothetical protein                                     | -5.2  |       |
| YPO0512 <sup>‡</sup>  | Putative lipoprotein                                     | -5.5  |       |
| YPO0513 <sup>‡</sup>  | Conserved hypothetical protein                           | -4.6  |       |
| YPO0514 <sup>‡</sup>  | Putative OmpA-family membrane protein                    | -4.4  | -3.6  |
| YPO0515 <sup>‡</sup>  | Putative membrane protein                                | -2.6  | -2.8  |
| YPO1192               | Conserved hypothetical protein                           | -3.3  |       |
| YPO1200               | Putative amino acid permease                             | -16.9 | -16.6 |
| YPO1201               | Putative amino acid decarboxylase                        | -5.2  |       |
| YPO1224               | <i>ampH</i> putative penicillin-binding protein          | -2.6  |       |
| YPO1301               | <i>psaE</i> putative regulatory protein                  | -5.7  | -9.8  |
| YPO1302               | <i>psaF</i> putative membrane protein                    | -4.7  | -11.3 |
| YPO1303               | <i>psaA</i> pH 6 antigen precursor (antigen 4) (adhesin) | -25.9 | -133  |
| YPO1304               | <i>psaB</i> chaperone protein PsaB precursor             | -8.7  | -66.5 |
| YPO1309               | <i>lysP/cadR</i> putative lysine-specific permease       | -3.6  |       |
| YPO1500               | Hypothetical protein                                     | -6.3  |       |
| YPO1684               | Putative membrane protein (pseudogene)                   | -6.5  |       |
| YPO1686               | Putative exported protein                                | -4.3  |       |
| YPO1793               | <i>inv</i> invasins (pseudogene)                         | -3.6  |       |
| YPO2271               | Phage hypothetical protein                               | -3.0  |       |
| YPO2272               | Phage hypothetical protein                               | -2.9  | -6.8  |
| YPO2531               | <i>elaB</i> putative membrane protein                    | -3    |       |
| YPO2538               | Putative lipoprotein                                     | -2.8  |       |
| YPO2667               | <i>ureC</i> urease alpha subunit                         | -3.2  | -3.1  |

|                      |                                                        |       |       |
|----------------------|--------------------------------------------------------|-------|-------|
| YPO2668              | <i>ureE</i> urease accessory protein                   | -2.8  |       |
| YPO2699              | Conserved hypothetical protein                         | -2.8  |       |
| YPO2700              | Conserved hypothetical protein                         | -2.7  |       |
| YPO2702              | Putative membrane protein                              | -2.2  |       |
| YPO4018              | <i>cysM</i> pyridoxal-phosphate dependent protein      | -15.1 | -43.3 |
| YPO4019              | Putative phosphoribosyl transferase protein            | -21.3 |       |
| YPO4020              | Putative membrane protein                              | -5.0  | -12.1 |
| YPO4021              | Hypothetical protein                                   | -4.9  |       |
| Up-regulated loci    |                                                        |       |       |
| YPO1232              | <i>msgA/dinI</i> putative stress response protein      | 4.5   | 5.2   |
| YPO1234              | Probable phage antitermination protein Q               | 3.8   |       |
| YPO1239              | Putative bacteriophage protein                         | 4.6   | 11.8  |
| YPO1240              | Putative ATP-binding protein                           | 4.7   |       |
| YPO1247              | Putative bacteriophage tail protein                    | 4.7   |       |
| YPO1252              | <i>stf</i> putative bacteriophage tail fiber protein   | 2.6   |       |
| YPO1386              | <i>ansB</i> putative L-asparaginase II precursor       | 12.9  | 17.5  |
| YPO1436              | <i>sulA/sfiA</i> putative cell division inhibitor      | 3.8   | 4.3   |
| YPO1586              | <i>dinI</i> DNA-damage-inducible protein I             | 3.3   | 3.9   |
| YPO1718              | Putative exported protein                              | 3.1   |       |
| YPO2066              | <i>zwf</i> glucose-6-phosphate 1-dehydrogenase         | 5.5   |       |
| YPO2080              | Conserved hypothetical protein                         | 2.6   |       |
| YPO2186              | <i>oppF</i> oligopeptide transport ATP-binding protein | 4.0   | 1.4   |
| YPO2274 <sup>§</sup> | Putative phage protein                                 | 10.5  |       |

|                       |                                                 |      |      |
|-----------------------|-------------------------------------------------|------|------|
| YPO2275 <sup>§</sup>  | Putative phage protein                          | 16.7 |      |
| YPO2276 <sup>§</sup>  | Putative phage-related membrane protein         | 28.1 |      |
| YPO2276a <sup>§</sup> | Putative phage-related membrane protein         | 18.4 |      |
| YPO2277 <sup>§</sup>  | Phage hypothetical protein                      | 23.2 | 66.7 |
| YPO2279 <sup>§</sup>  | Putative phage-related membrane protein         | 29.9 |      |
| YPO3307               | <i>recA/lexB/umuB/recH/rnmB/tif/zab</i> protein | 2.4  | 2.3  |
| YPO3518               | Putative exported protein                       | 5.5  |      |
| <i>pst</i>            | Pst encoded on pPCP1                            | 4.2  | 6.5  |

---

\* Fold difference in gene transcripts between wildtype and the *ΔrovA* mutant as determined by microarray analysis that were  $\geq 2$ -fold different with a *P* value  $\leq 0.05$  as described in *Materials and Methods*.

† Fold difference in gene transcripts between wildtype and the *ΔrovA* mutant as determined by qRT-PCR. The value listed is the average fold difference from multiple repeats of qRT-PCR performed on different biological replicates as described in the *Material and Methods*.

‡ IAHP locus (1, 2).

§ CUS-2 phage locus (3).

1. Parkhill, J, Wren B, Thomson NR, Titball RW, Holden MT, Prentice MB, Sebaihia M, James KD, Churcher C, Mungall KL, et al. (2001) *Nature* 413, 523-527.
2. Pukatzki S, Ma AT, Sturtevant D, Krastins B, Sarracino D, Nelson WC, Heidelberg JF, & Mekalanos JJ (2006) *Proc. Natl. Acad. Sci. U.S.A.* 103, 1528-1533.

3. Gonzalez MD, Lichtensteiger CA, & Vimr ER (2001) *FEMS Microbiol. Lett.* 198, 125-128.
