# Supplementary material
Source: PubMed Central journal article supplement (PMC1569194)

**A.**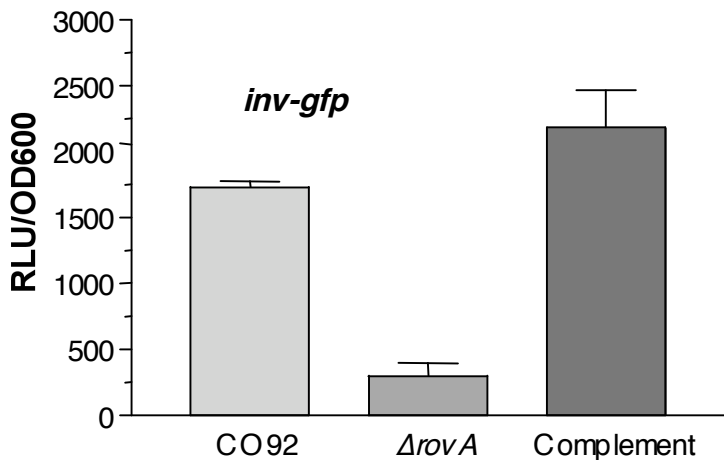**B.**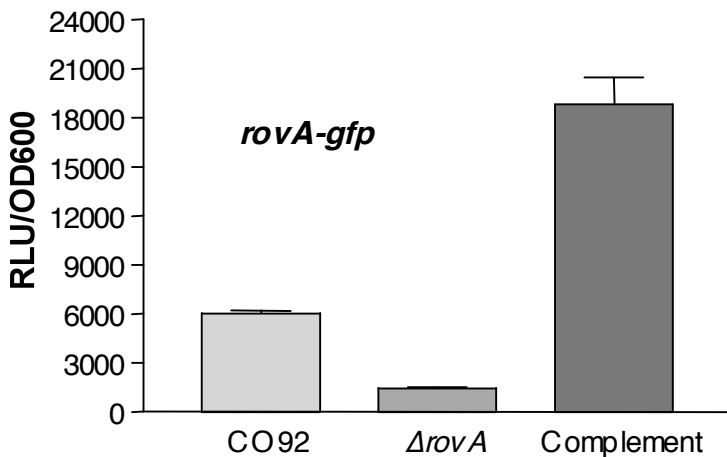

Supplement: pnas_0603456103_1.pdf [file pnas_0603456103_1.pdf]

**A.**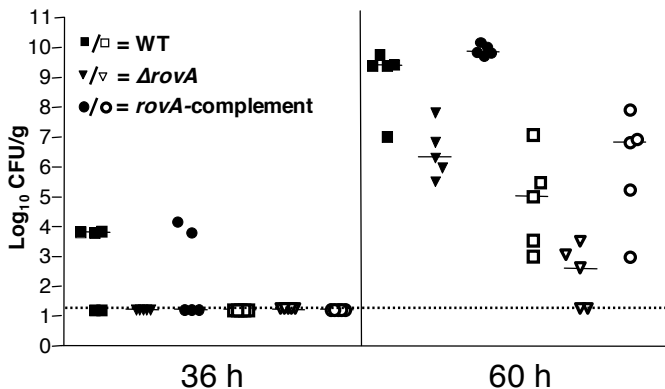**B.**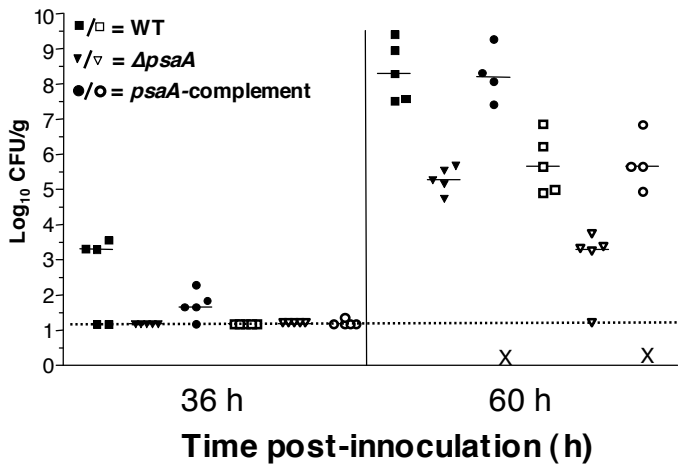

Supplement: pnas_0603456103_2.pdf [file pnas_0603456103_2.pdf]

# Intraperitoneal

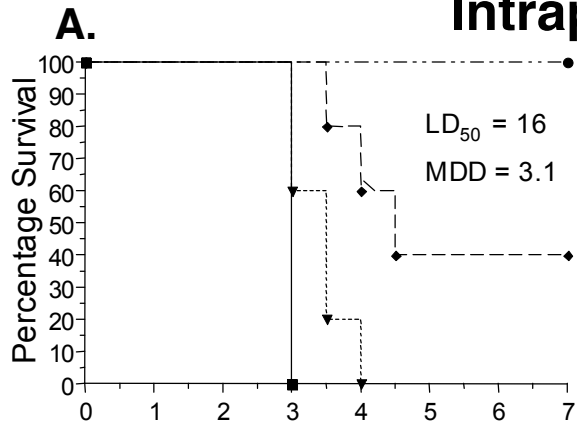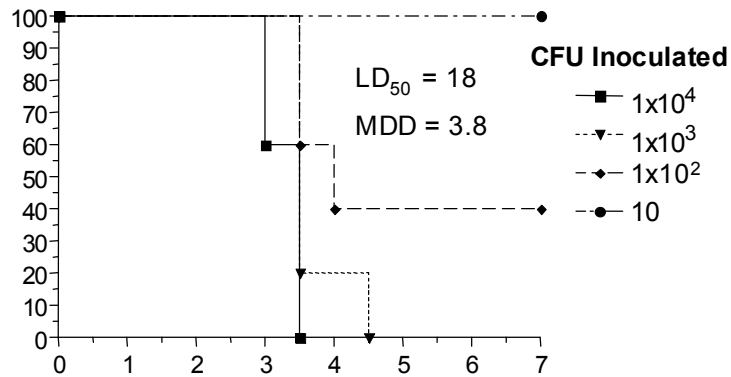

# Intranasal

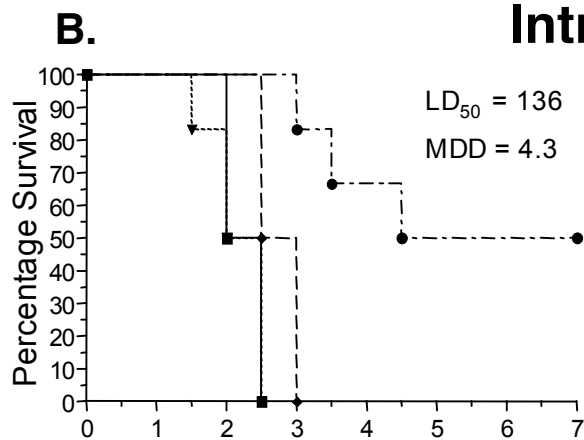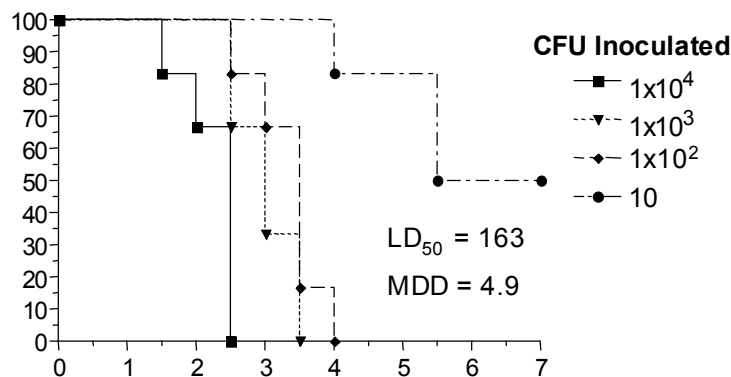

# Subcutaneous

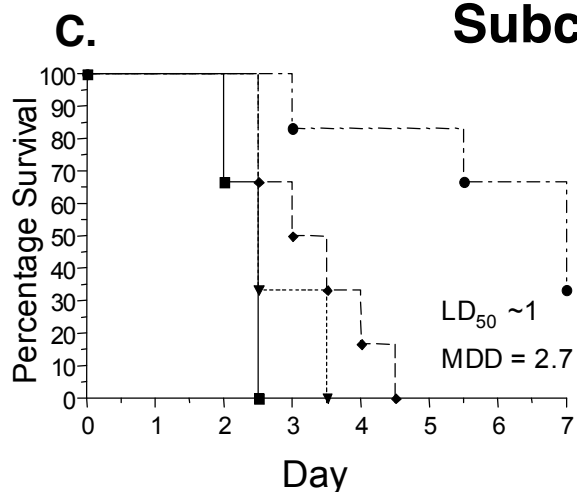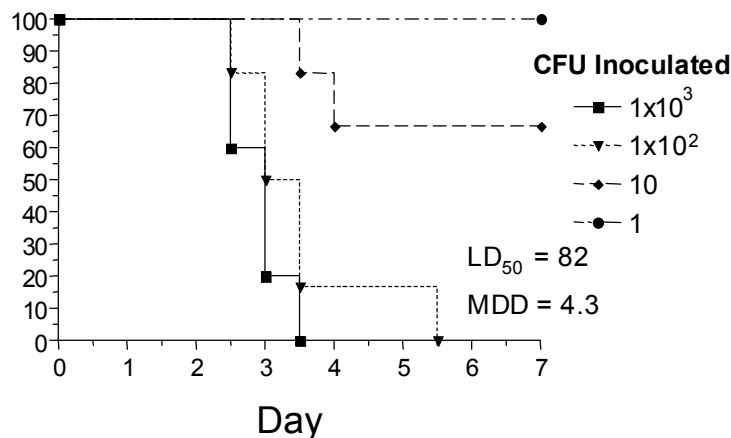

Wild-type

$\Delta$ rovA

Supplement: pnas_0603456103_3.pdf [file pnas_0603456103_3.pdf]
